# Supplementary material for: Identifying the miRNA Signature Association with Aging-Related Senescence in Glioblastoma
Source: Int J Mol Sci. 2021 Jan 6;22(2):517. doi: 10.3390/ijms22020517 (PMC7825621; doi:10.3390/ijms22020517)
Supplement: Supplementary file 1 [file ijms-22-00517-s001.pdf]

**Supplementary Table 1.** Gene Ontology (GO) annotations of miRNA targeting cellular signaling retrieved using hyper geometric testing. Identified GO terms, p-value level of ontology annotation (biological process, molecular process and cellular component) along with functional description are given from the network analysis. Lower the P-value gives better reliability of functional relevance for the identified in the network.

| GO Term    | P-value | Description                                                          | Ontology           |
|------------|---------|----------------------------------------------------------------------|--------------------|
| GO:0050794 | 0.0000  | regulation of cellular process                                       | biological process |
| GO:0050789 | 0.0000  | regulation of biological process                                     | biological process |
| GO:0065007 | 0.0000  | biological regulation                                                | biological process |
| GO:0043067 | 0.0002  | regulation of programmed cell death                                  | biological process |
| GO:0042981 | 0.0002  | regulation of apoptotic process                                      | biological process |
| GO:0010941 | 0.0002  | regulation of cell death                                             | biological process |
| GO:0051254 | 0.0005  | positive regulation of RNA metabolic process                         | biological process |
| GO:0006468 | 0.0006  | protein phosphorylation                                              | biological process |
| GO:1902680 | 0.0008  | positive regulation of RNA biosynthetic process                      | biological process |
| GO:0010562 | 0.0010  | positive regulation of phosphorus metabolic process                  | biological process |
| GO:0045937 | 0.0010  | positive regulation of phosphate metabolic process                   | biological process |
| GO:0031399 | 0.0010  | regulation of protein modification process                           | biological process |
| GO:0051726 | 0.0011  | regulation of cell cycle                                             | biological process |
| GO:0045595 | 0.0011  | regulation of cell differentiation                                   | biological process |
| GO:0042327 | 0.0011  | positive regulation of phosphorylation                               | biological process |
| GO:0045893 | 0.0011  | positive regulation of transcription, DNA-templated                  | biological process |
| GO:0031401 | 0.0013  | positive regulation of protein modification process                  | biological process |
| GO:0010628 | 0.0013  | positive regulation of gene expression                               | biological process |
| GO:0051247 | 0.0016  | positive regulation of protein metabolic process                     | biological process |
| GO:0044699 | 0.0019  | single-organism process                                              | biological process |
| GO:0032270 | 0.0020  | positive regulation of cellular protein metabolic process            | biological process |
| GO:0033043 | 0.0022  | regulation of organelle organization                                 | biological process |
| GO:0045944 | 0.0025  | positive regulation of transcription from RNA polymerase II promoter | biological process |
| GO:0044763 | 0.0026  | single-organism cellular process                                     | biological process |
| GO:1901701 | 0.0032  | cellular response to oxygen-containing compound                      | biological process |
| GO:0080134 | 0.0032  | regulation of response to stress                                     | biological process |
| GO:0010648 | 0.0042  | negative regulation of cell communication                            | biological process |
| GO:0023057 | 0.0043  | negative regulation of signaling                                     | biological process |
| GO:0007268 | 0.0046  | synaptic transmission                                                | biological process |
| GO:0007167 | 0.0049  | enzyme linked receptor protein signaling pathway                     | biological process |
| GO:0042325 | 0.0052  | regulation of phosphorylation                                        | biological process |
| GO:0018193 | 0.0053  | peptidyl-amino acid modification                                     | biological process |
| GO:0051130 | 0.0058  | positive regulation of cellular component organization               | biological process |
| GO:0071495 | 0.0063  | cellular response to endogenous stimulus                             | biological process |
| GO:0060284 | 0.0064  | regulation of cell development                                       | biological process |
| GO:0043085 | 0.0073  | positive regulation of catalytic activity                            | biological process |
| GO:0009968 | 0.0077  | negative regulation of signal transduction                           | biological process |
| GO:0016192 | 0.0079  | vesicle-mediated transport                                           | biological process |
| GO:2000026 | 0.0086  | regulation of multicellular organismal development                   | biological process |
| GO:0048699 | 0.0089  | generation of neurons                                                | biological process |
| GO:1901068 | 0.0097  | guanosine-containing compound metabolic process                      | biological process |
| GO:0046039 | 0.0100  | GTP metabolic process                                                | biological process |
| GO:0001932 | 0.0106  | regulation of protein phosphorylation                                | biological process |
| GO:1901069 | 0.0108  | guanosine-containing compound catabolic process                      | biological process |
| GO:0006184 | 0.0110  | GTP catabolic process                                                | biological process |

|            |        |                                                                    |                    |
|------------|--------|--------------------------------------------------------------------|--------------------|
| GO:0007417 | 0.0111 | central nervous system development                                 | biological process |
| GO:0051172 | 0.0119 | negative regulation of nitrogen compound metabolic process         | biological process |
| GO:0051094 | 0.0123 | positive regulation of developmental process                       | biological process |
| GO:0030182 | 0.0126 | neuron differentiation                                             | biological process |
| GO:0048585 | 0.0145 | negative regulation of response to stimulus                        | biological process |
| GO:0045892 | 0.0148 | negative regulation of transcription, DNA-templated                | biological process |
|            |        | negative regulation of nucleobase-containing compound metabolic    |                    |
| GO:0045934 | 0.0150 | process                                                            | biological process |
| GO:0051336 | 0.0178 | regulation of hydrolase activity                                   | biological process |
| GO:0009790 | 0.0178 | embryo development                                                 | biological process |
| GO:0007169 | 0.0185 | transmembrane receptor protein tyrosine kinase signaling pathway   | biological process |
| GO:0070647 | 0.0185 | protein modification by small protein conjugation or removal       | biological process |
| GO:0051253 | 0.0186 | negative regulation of RNA metabolic process                       | biological process |
| GO:0009890 | 0.0193 | negative regulation of biosynthetic process                        | biological process |
| GO:0031327 | 0.0219 | negative regulation of cellular biosynthetic process               | biological process |
| GO:0051345 | 0.0221 | positive regulation of hydrolase activity                          | biological process |
| GO:1902679 | 0.0244 | negative regulation of RNA biosynthetic process                    | biological process |
| GO:0007010 | 0.0267 | cytoskeleton organization                                          | biological process |
| GO:0010629 | 0.0275 | negative regulation of gene expression                             | biological process |
| GO:2000113 | 0.0291 | negative regulation of cellular macromolecule biosynthetic process | biological process |
| GO:0070848 | 0.0295 | response to growth factor                                          | biological process |
| GO:0022603 | 0.0305 | regulation of anatomical structure morphogenesis                   | biological process |
| GO:0031329 | 0.0321 | regulation of cellular catabolic process                           | biological process |
| GO:1901700 | 0.0335 | response to oxygen-containing compound                             | biological process |
| GO:0071363 | 0.0347 | cellular response to growth factor stimulus                        | biological process |
| GO:0009719 | 0.0350 | response to endogenous stimulus                                    | biological process |
| GO:0010558 | 0.0353 | negative regulation of macromolecule biosynthetic process          | biological process |
| GO:0061024 | 0.0367 | membrane organization                                              | biological process |
| GO:0007267 | 0.0412 | cell-cell signaling                                                | biological process |
| GO:0045184 | 0.0421 | establishment of protein localization                              | biological process |
| GO:0009894 | 0.0421 | regulation of catabolic process                                    | biological process |
| GO:0048666 | 0.0425 | neuron development                                                 | biological process |
| GO:0009725 | 0.0442 | response to hormone                                                | biological process |
| GO:0051338 | 0.0452 | regulation of transferase activity                                 | biological process |
| GO:0031175 | 0.0483 | neuron projection development                                      | biological process |
| GO:0005515 | 0.0000 | protein binding                                                    | molecular function |
| GO:0043565 | 0.0010 | sequence-specific DNA binding                                      | molecular function |
| GO:0008270 | 0.0011 | zinc ion binding                                                   | molecular function |
| GO:0001071 | 0.0063 | nucleic acid binding transcription factor activity                 | molecular function |
| GO:0003700 | 0.0064 | sequence-specific DNA binding transcription factor activity        | molecular function |
| GO:0005488 | 0.0127 | binding                                                            | molecular function |
| GO:0016301 | 0.0317 | kinase activity                                                    | molecular function |
| GO:0004871 | 0.0397 | signal transducer activity                                         | molecular function |
| GO:0060089 | 0.0397 | molecular transducer activity                                      | molecular function |
|            |        |                                                                    | cellular           |
| GO:0030054 | 0.0052 | cell junction                                                      | component          |
|            |        |                                                                    | cellular           |
| GO:1902494 | 0.0466 | catalytic complex                                                  | component          |
